# Supplementary material for: 2D conductive MOFs with sufficient redox sites: reduced graphene oxide/Cu-benzenehexathiolate composites as high capacity anode materials for lithium-ion batteries
Source: Royal Society of Chemistry journal article supplement (doi:10.1039/d0nr08549a), 2021-01-01
Supplement: d0nr08549a1.pdf [file d0nr08549a1.pdf]

## Supporting Information

### **2D conductive MOF with sufficient redox sites: reduced graphene oxide/Cu-benzenehexathiolate composites as high capacity anode materials for lithium-ion battery**

Chunfeng Meng,<sup>a</sup> Pinfei Hu,<sup>b</sup> Hantao Chen,<sup>b</sup> Yueji Cai,<sup>b</sup> Hu Zhou,<sup>a</sup> Zehong Jiang,<sup>b</sup> Xiang Zhu,<sup>c</sup> Zeyu Liu,<sup>b</sup> Chengyin Wang,<sup>d</sup> and Aihua Yuan<sup>\* b</sup>

<sup>a</sup> School of Material Science and Technology, Jiangsu University of Science and Technology, Zhenjiang, Jiangsu 212003, P. R. China

<sup>b</sup> School of Environmental and Chemical Engineering, Jiangsu University of Science and Technology, Zhenjiang, Jiangsu 212003, P. R. China

<sup>c</sup> Suzhou Research Institute, Lanzhou Institute of Chemical Physics, Chinese Academy of Sciences, Lanzhou 730000, P. R. China

<sup>d</sup> School of Chemical and Chemistry Engineering, Yangzhou University, Yangzhou, Jiangsu 225002, P. R. China

E-mail: aihua.yuan@just.edu.cn

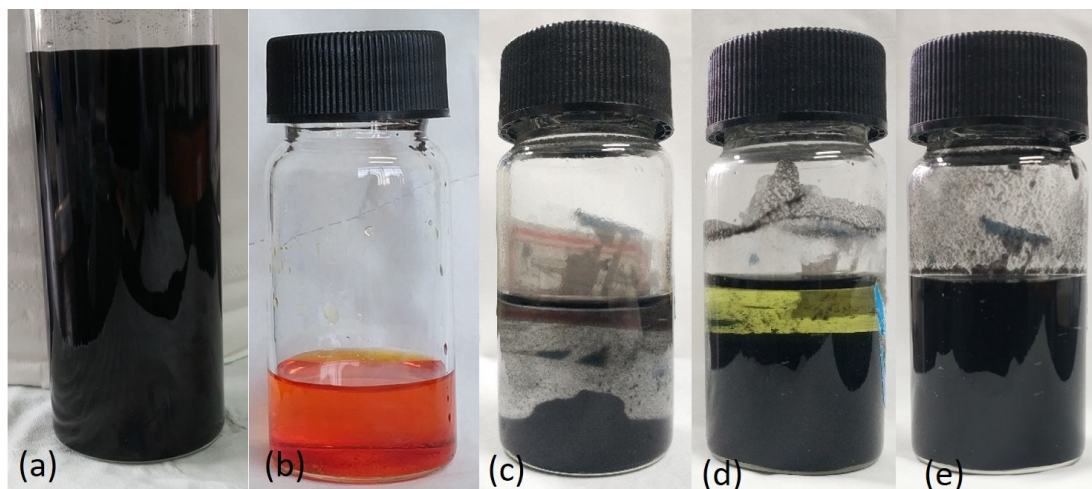

Figure S1. (a) Optical images of rGO dispersion after prepared for a week, (b) BHT solution in DMF, (c) as-prepared Cu-BHT in DMF, (d) rGO/Cu-BHT 1:1 composite in DMF, 10 min after reaction, (e) rGO dispersion and Cu-BHT solid after sonication and rest for 1 hour.

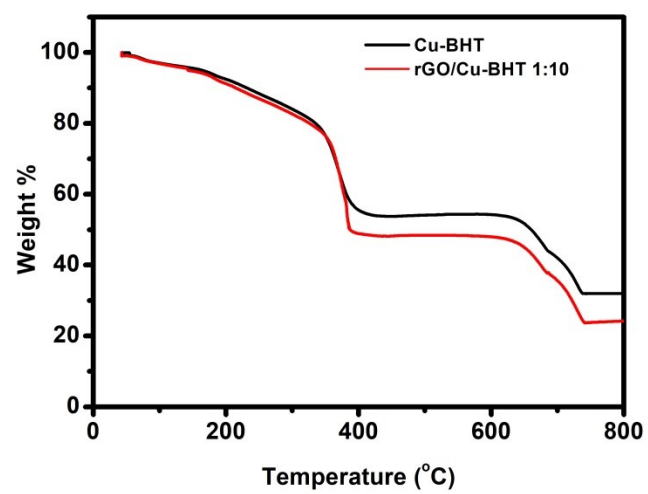

Figure S2. Thermogravimetry study of the Cu-BHT and rGO/Cu-BHT 1:10, in air.

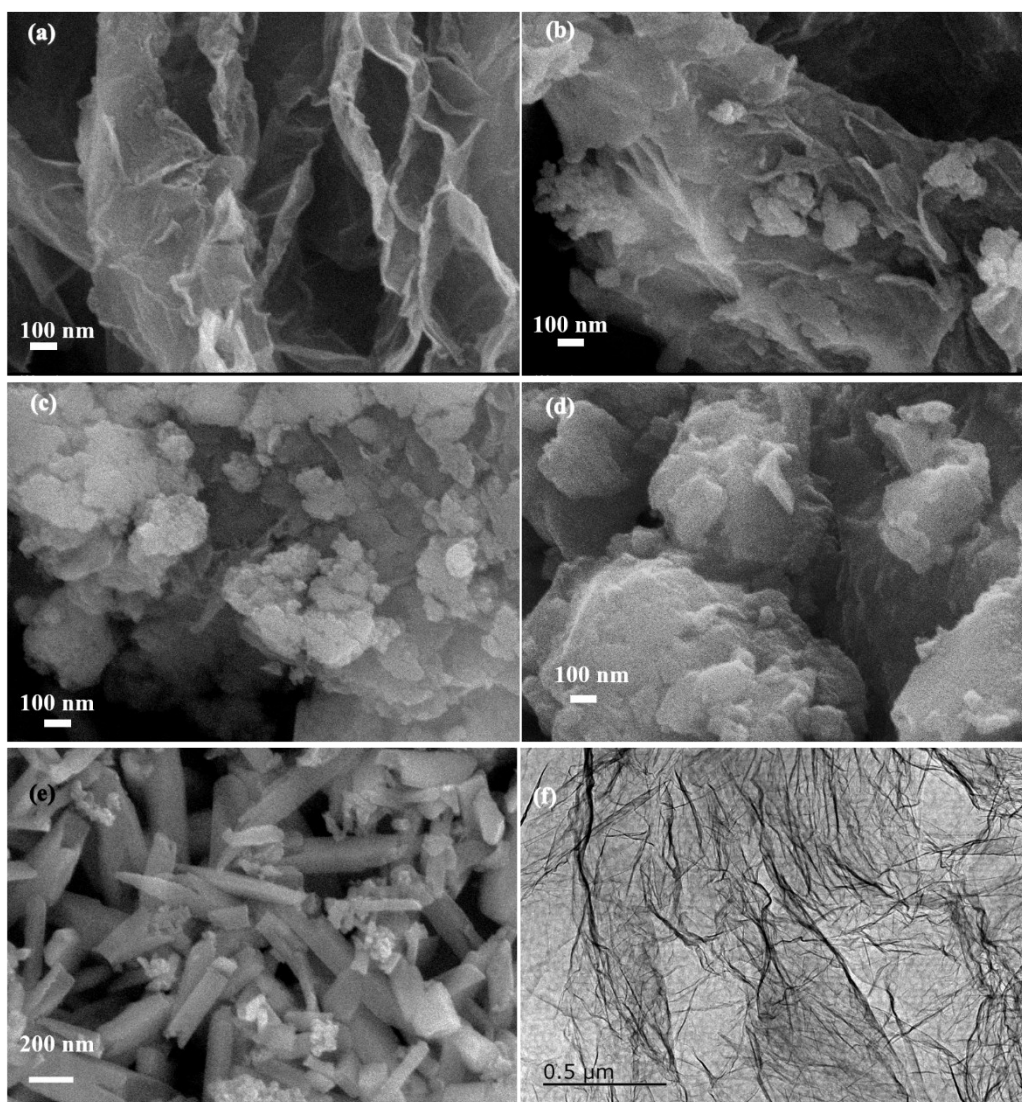

Figure S3. (a, b, c, d, e) FESEM image of rGO/Cu-BHT 3:1, 1:3, 1:10, pristine amorphous Cu-BHT, semicrystalline Cu-BHT; (f) TEM image reduced graphene oxide.

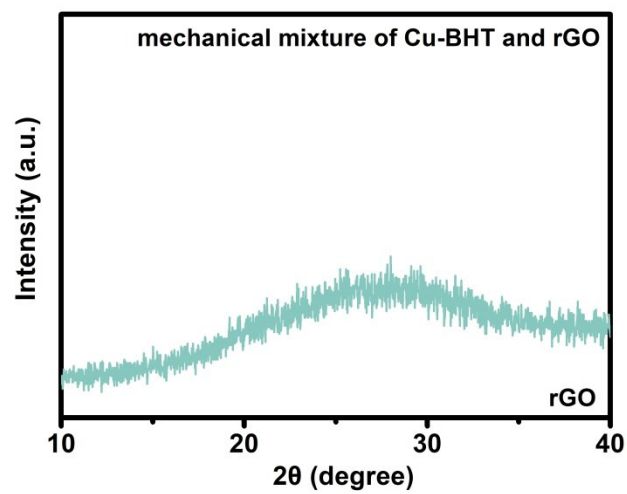

Figure S4. The XRD spectra of the rGO and Cu-BHT mechanical mixture, with a mass ratio of 1:1.

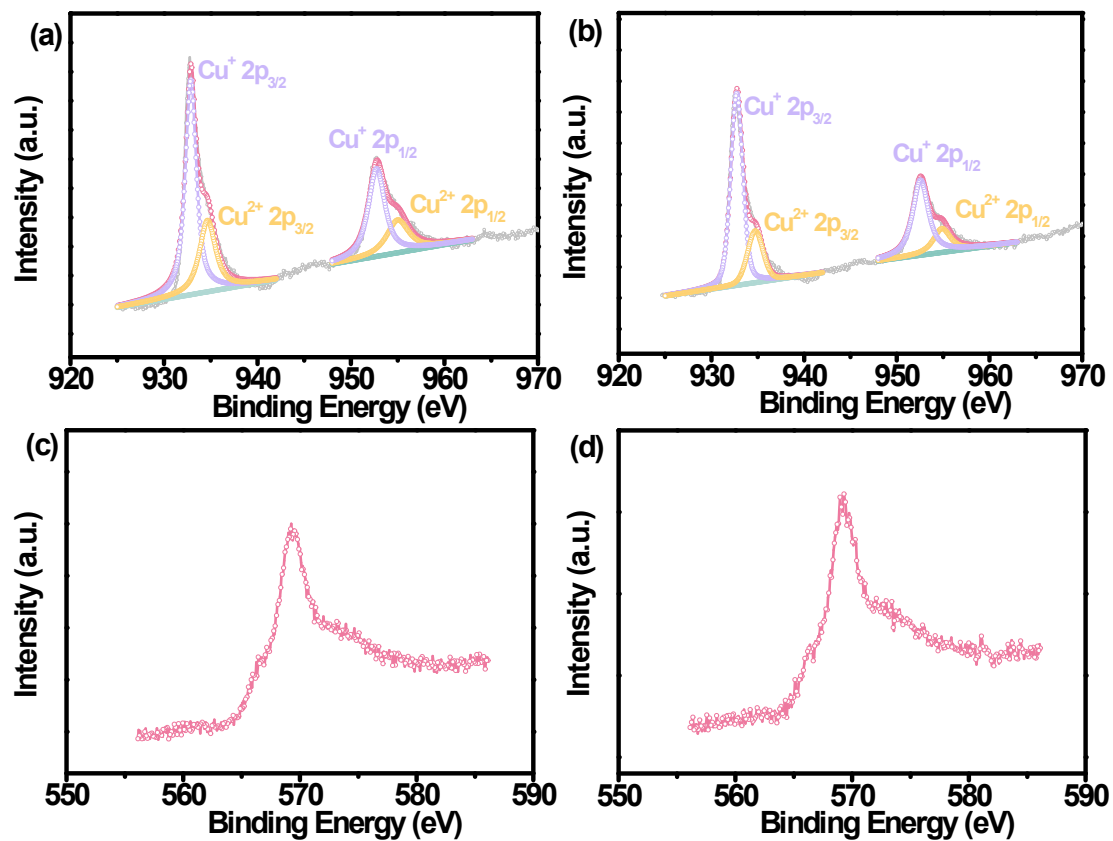

Figure S5. The high-resolution Cu 2p spectra of (a) Cu-BHT and (b) rGO/Cu-BHT 1:1; Cu LMM spectra of (c) Cu-BHT and (d) rGO/Cu-BHT 1:1.

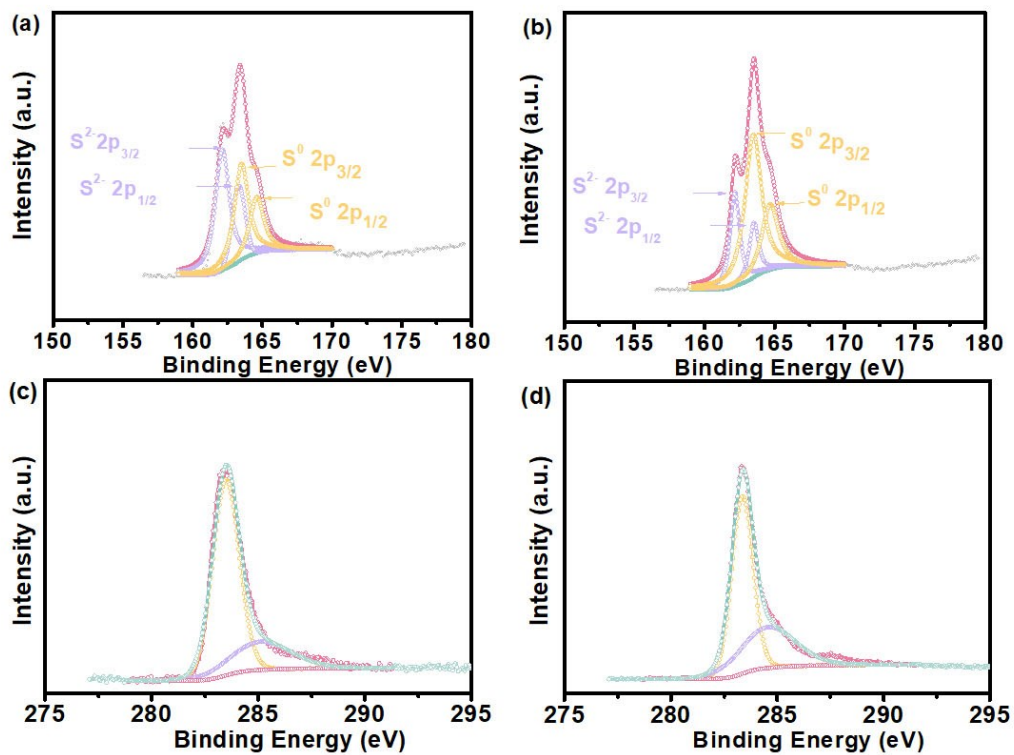

Figure S6. The high-resolution S 2p and C 1s spectra of Cu-BHT (a&c) and rGO/Cu-BHT 1:1(b&d).

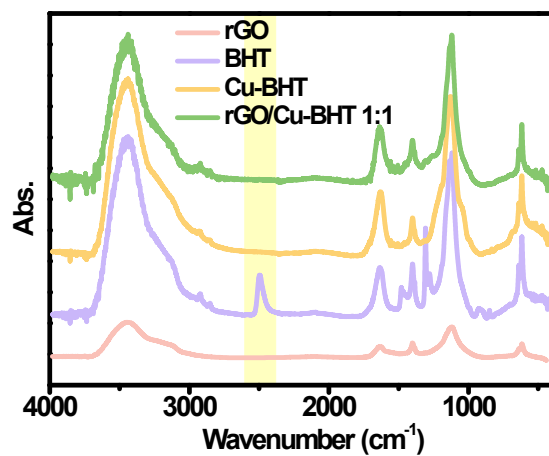

Figure S7. FTIR spectra of Cu-BHT, rGO/Cu-BHT, BHT and rGO.



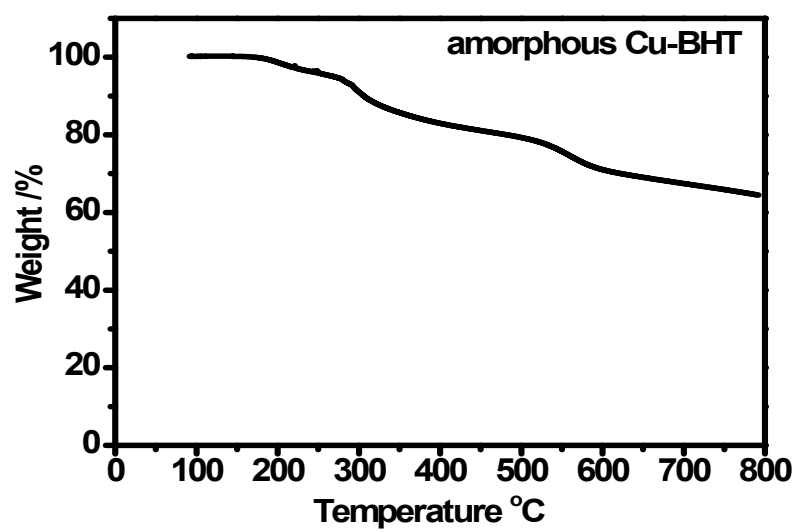

Figure S8. The thermogravimetric curve of Cu-BHT.

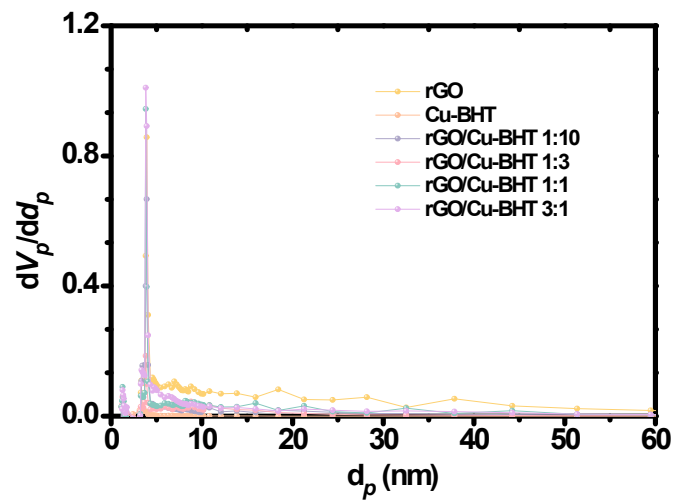

Figure S9. The total pore volumes of reduced graphene oxide, rGO/Cu-BHT (3:1, 1:1, 1:3, 1:10), and pristine Cu-BHT.

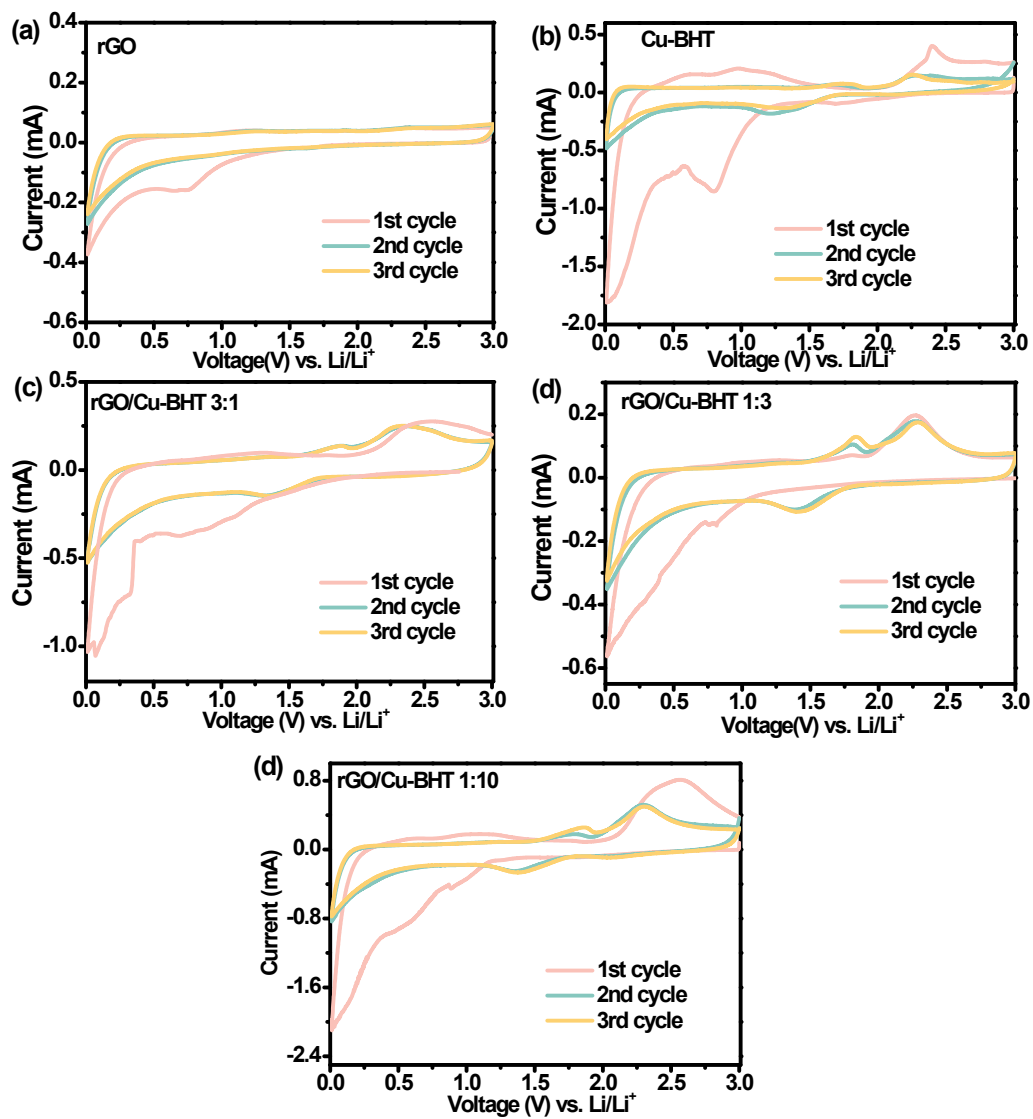

Figure S10. The first three CV curves of (a) reduced graphene oxide, (b) pristine Cu-BHT, (c, d, e) rGO/Cu-BHT (3:1, 1:3, 1:10).

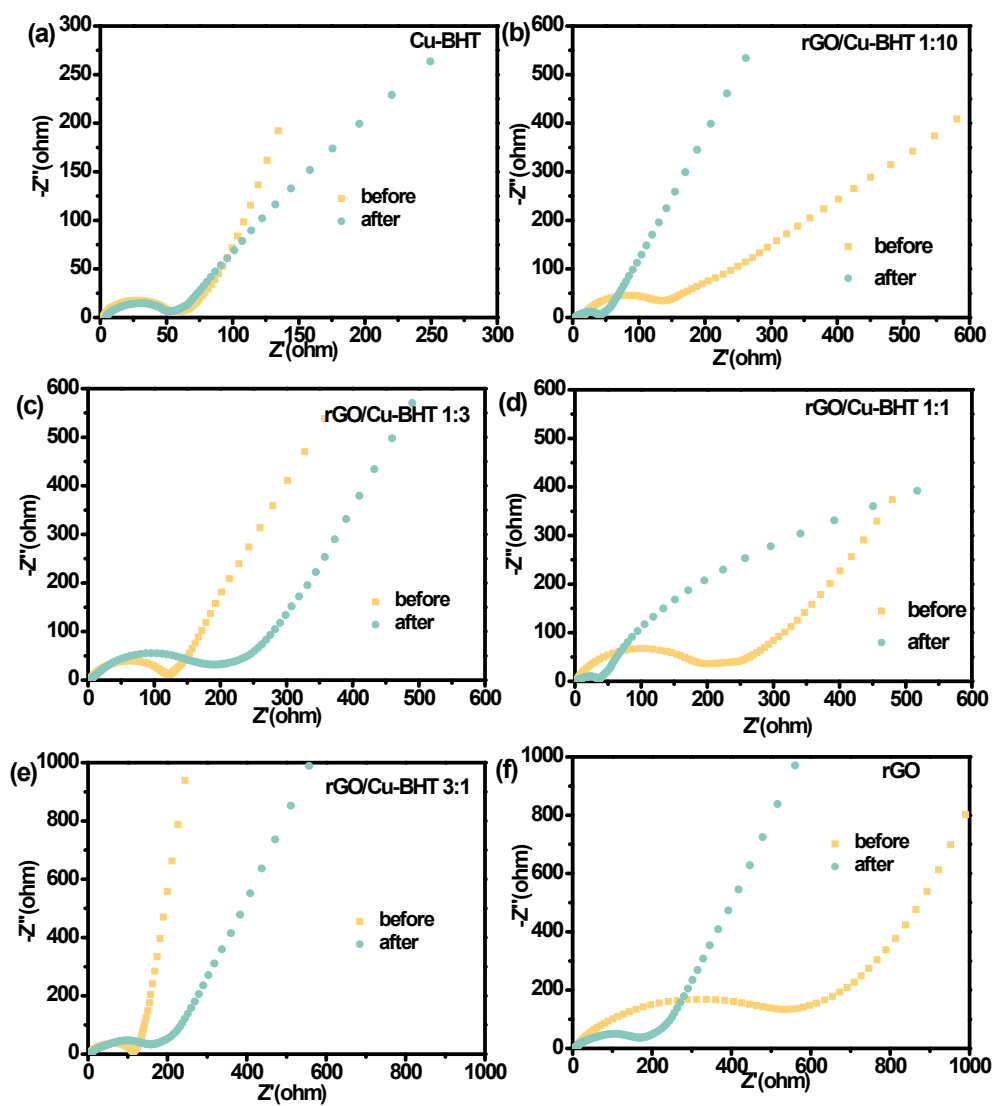

Figure S11. Impedance spectra of (a) Cu-BHT, (b-e) rGO/Cu-BHT (1:10, 1:3, 1:1, 3:1), and (f) rGO.

Figure S12. The plot of  $Z'$  vs. the reciprocal root square of the low angular frequencies ( $\omega^{-1/2}$ ).

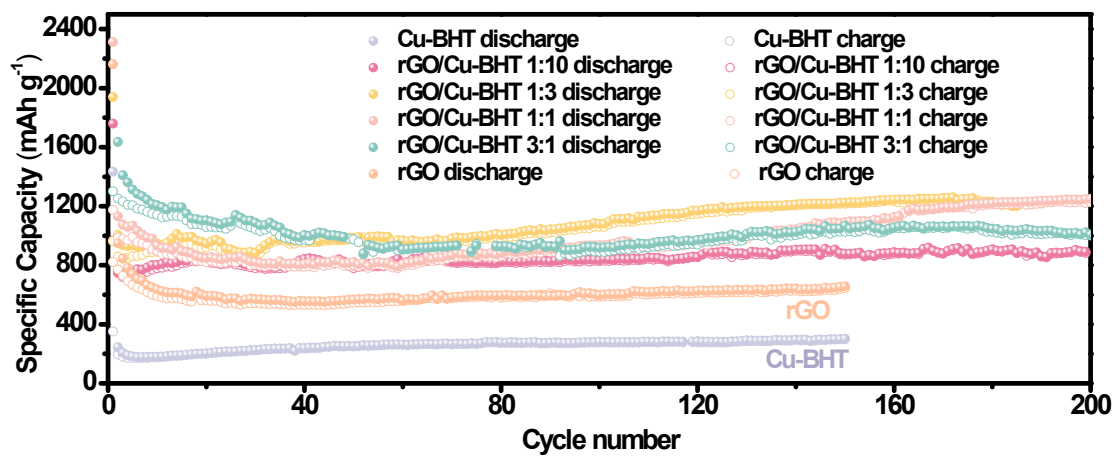

Figure S13. Cycle performance of rGO/Cu-BHT composites at a current density of 100 mA g<sup>-1</sup>.

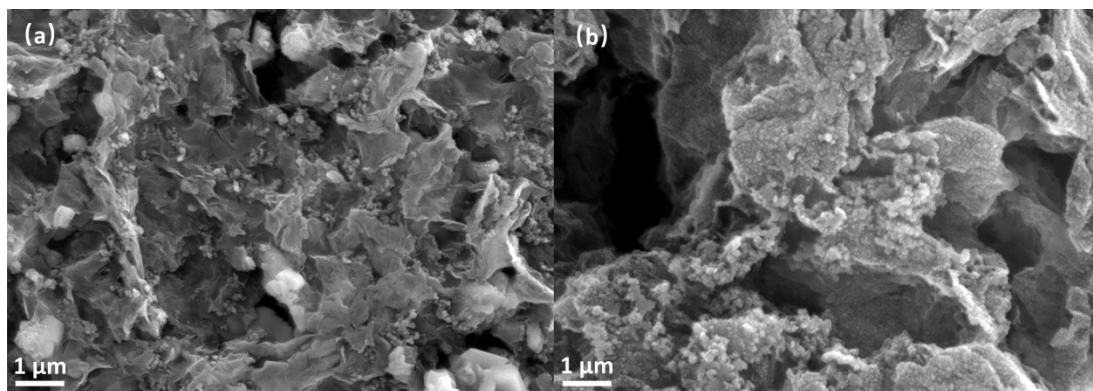

Figure S14. The morphology of rGO/Cu-BHT 1:1, (a) before cycle and (b) after 100 cycles.

Figure S15. Rate performance of (a) amorphous Cu-BHT and (b) rGO/Cu-BHT 1:10.

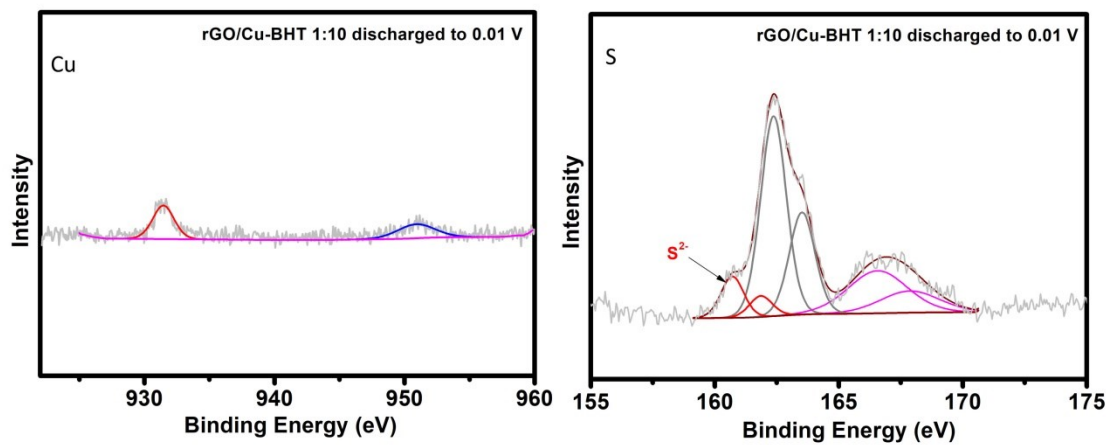

Figure S16. XPS spectrum of discharged Cu-BHT, Cu 2p (left) and S 2p (right).



**Table S1. Diffusion coefficients of Cu-BHT based compounds**

| Sample | Slope (Before cycle) | $D_{Li^+}$ (Before cycle) $cm^2 s^{-1}$ | Slope (After cycle) | $D_{Li^+}$ (After cycle) $cm^2 s^{-1}$ |
|--------|----------------------|-----------------------------------------|---------------------|----------------------------------------|
| Cu-BHT | 1046.07              | $1.32 \times 10^{-15}$                  | 894.66              | $1.80 \times 10^{-15}$                 |
| 1:10   | 258.18               | $2.16 \times 10^{-14}$                  | 44.29               | $7.34 \times 10^{-13}$                 |
| 1:3    | 80.87                | $2.20 \times 10^{-13}$                  | 113.47              | $1.12 \times 10^{-13}$                 |
| 1:1    | 71.07                | $2.15 \times 10^{-13}$                  | 34.53               | $1.21 \times 10^{-12}$                 |
| 3:1    | 21.49                | $3.10 \times 10^{-12}$                  | 84.89               | $2.00 \times 10^{-13}$                 |
| rGO    | 41.40                | $1.15 \times 10^{-12}$                  | 79.29               | $3.14 \times 10^{-13}$                 |

### Contribution calculation of rGO and Cu-BHT in rGO/CuBHT composites

Since the capacity of rGO went steady to 545.2 mAh g<sup>-1</sup>, so the capacity of rGO was treated as a constant. The capacities of rGO/Cu-BHT (3:1, 1:1, 1:3, 1:10) composites at 100 mA g<sup>-1</sup> were listed in the second column in the following Table S2.

The specific capacity contribution of rGO in rGO/CuBHT 3:1 =  $3/(3+1) \times 545.2 \text{ mAh g}^{-1} / 1008.9 \text{ mAh g}^{-1} = 40.5\%$ , and hence the contribution of Cu-BHT =  $1 - 40.5\% = 59.5\%$ .

The specific capacity contribution of rGO in rGO/CuBHT 1:1 =  $1/(1+1) \times 545.2 \text{ mAh g}^{-1} / 1249.5 \text{ mAh g}^{-1} = 21.8\%$ , and hence the contribution of Cu-BHT =  $1 - 21.8\% = 78.2\%$ .

The specific capacity contribution of rGO in rGO/CuBHT 1:3 =  $1/(1+3) \times 545.2 \text{ mAh g}^{-1} / 1218.5 \text{ mAh g}^{-1} = 11.2\%$ , and hence the contribution of Cu-BHT =  $1 - 11.2\% = 88.8\%$ .

The specific capacity contribution of rGO in rGO/CuBHT 1:10 =  $1/(1+10) \times 545.2 \text{ mAh g}^{-1} / 891.1 \text{ mAh g}^{-1} = 5.5\%$ , and hence the contribution of Cu-BHT =  $1 - 5.5\% = 94.5\%$ .

**Table S2. Weight ratios and capacity contributions of rGO and Cu-BHT in composites**

| Sample         | Specific capacity, mAh g <sup>-1</sup> | Weight ratio of rGO | Capacity contribution of rGO | Weight ratio of Cu-BHT | Capacity contribution of Cu-BHT |
|----------------|----------------------------------------|---------------------|------------------------------|------------------------|---------------------------------|
| rGO/CuBHT 3:1, | 1008.9                                 | 75%                 | 40.5%                        | 25%                    | 59.5%.                          |
| rGO/CuBHT 1:1  | 1249.5                                 | 50%                 | 21.8%                        | 50%                    | 78.2%                           |
| rGO/CuBHT 1:3  | 1218.5                                 | 25%                 | 11.2%                        | 75%                    | 88.8%                           |
| rGO/CuBHT 1:10 | 891.1                                  | 9.1%                | 5.5%                         | 90.9%                  | 94.5%                           |
